# Supplementary material
Source: PubMed Central journal article supplement (PMC8164356)

# Supplementary Figure 1

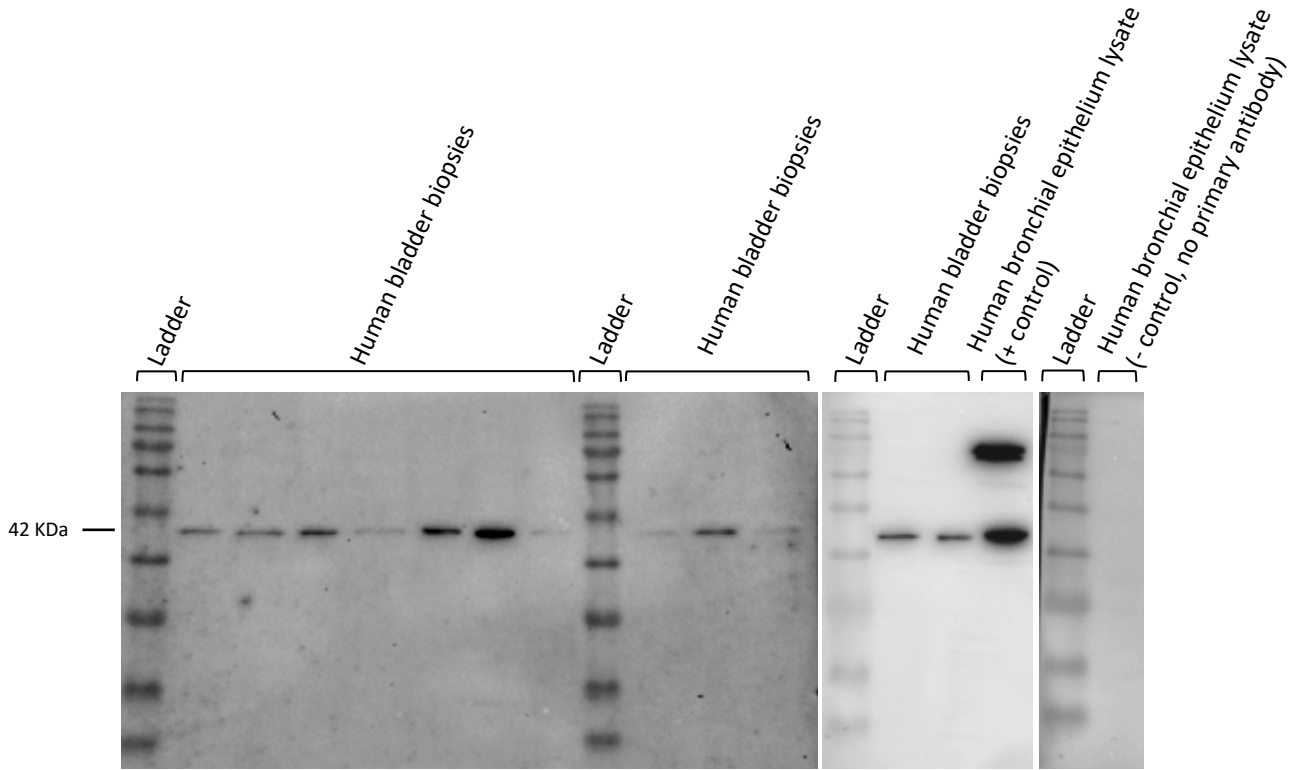

P2Y6, Abcam 92504, expected band size : 42 KDa

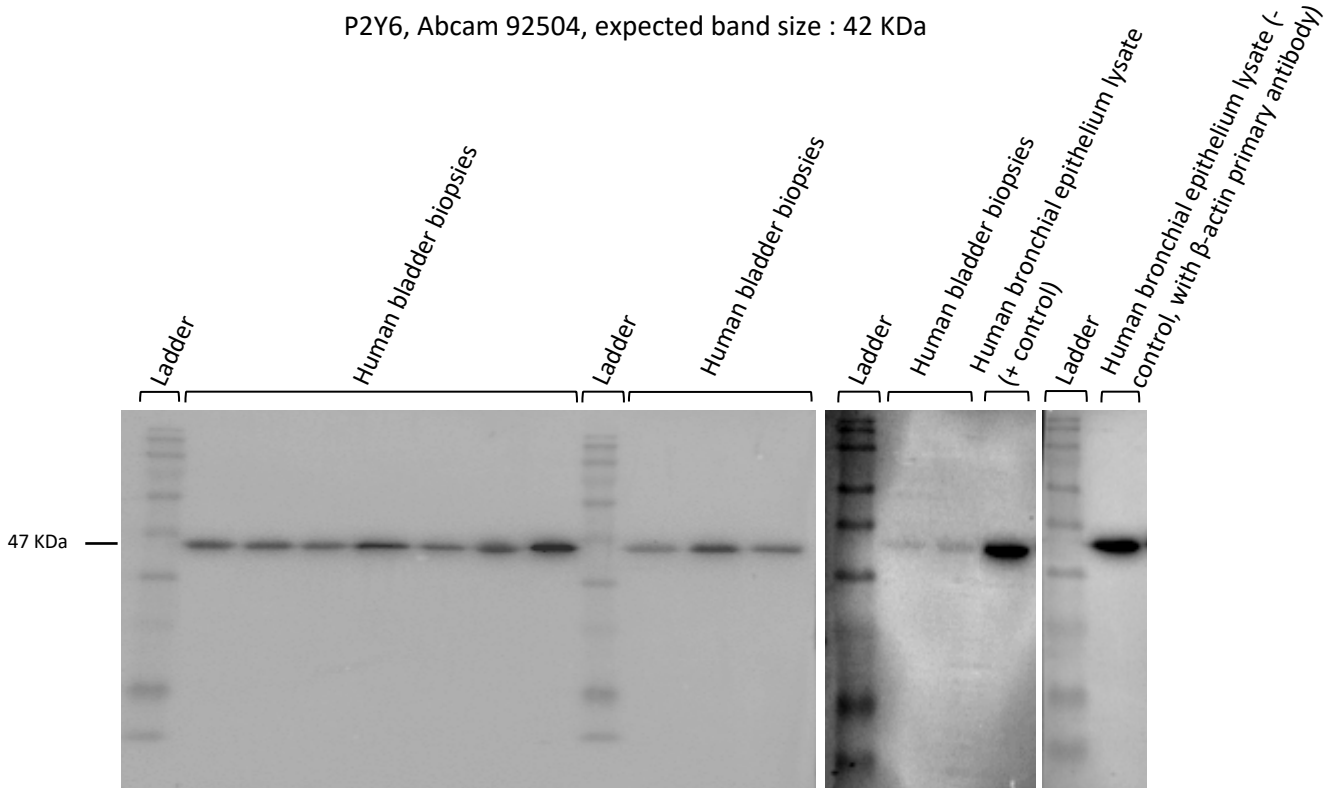

$\beta$ -actin, Abcam 8227, expected band size: 47 KDa

Supplement: NIHMS1699940-supplement-Supplemental_Figure_1.pdf [file NIHMS1699940-supplement-Supplemental_Figure_1.pdf]
